# Supplementary material
Source: PubMed Central journal article supplement (PMC3400540)
Supplement: supp_blood-2008-02-139634_TableS1.pdf [file supp_blood-2008-02-139634_TableS1.pdf]

|               | Intact WBC     | PMN depl       | PMN depl +<br>PMN sec |
|---------------|----------------|----------------|-----------------------|
| IL-6R [ng/ml] | 1.03 ± 0.05    | 1.12 ± 0.10    | 0.96 ± 0.09           |
| MCP-1 [pg/ml] | 315.46 ± 25.06 | 300.11 ± 35.29 | 384.09 ± 37.65        |
| MCP-3 [pg/ml] | 106.12 ± 11.94 | 96.08 ± 12.35  | 117.53 ± 29.05        |
